# Supplementary material for: RuO2/MnO2 core–shell nanorods for supercapacitors
Source: Royal Society of Chemistry journal article supplement (doi:10.1039/c3ta11027c), 2013-01-01
Supplement: c3ta11027c.pdf [file c3ta11027c.pdf]

# Supplementary Information

## **RuO<sub>2</sub>/MnO<sub>2</sub> core/shell nanorods for supercapcitors**

**Jen-Chun Chou, Yu-Liang Chen, Min-Han Yang, Yu-Ze Chen, Chih-Chung Lai,  
Hsin-Tien Chiu, Chi-Young Lee, Yu-Lun Chueh, and Jon-Yiew Gan\***

Department of Materials Science and Engineering, National Tsing Hua University,  
Hsinchu, Taiwan

\* EMAIL ADDRESS: jygan@mx.nthu.edu.tw

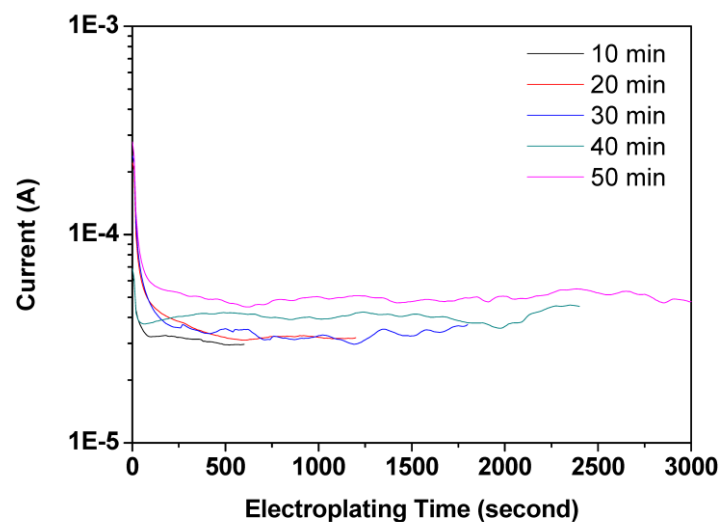

**Figure S1.** Electroplating currents of samples with various MnO<sub>2</sub> coating time.

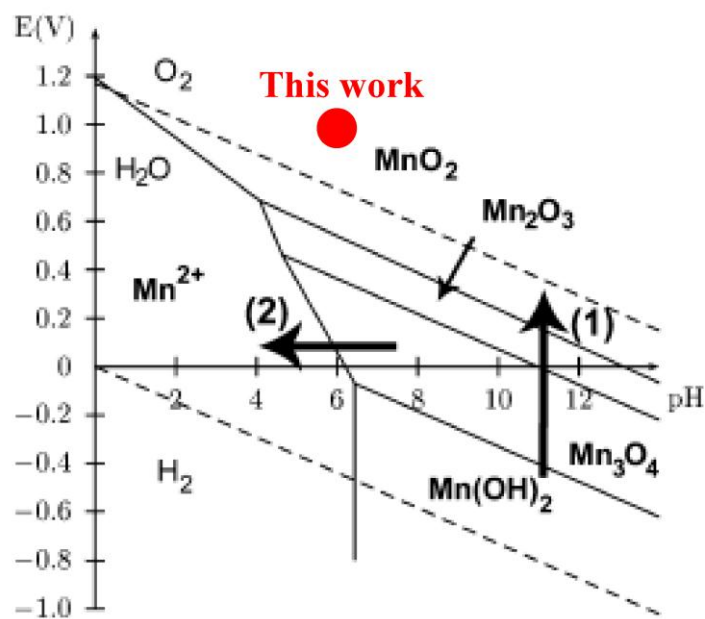

**Figure S2.** Pourbaix diagram obtained from the literature.<sup>1</sup> Red circle indicates our electroplating condition.

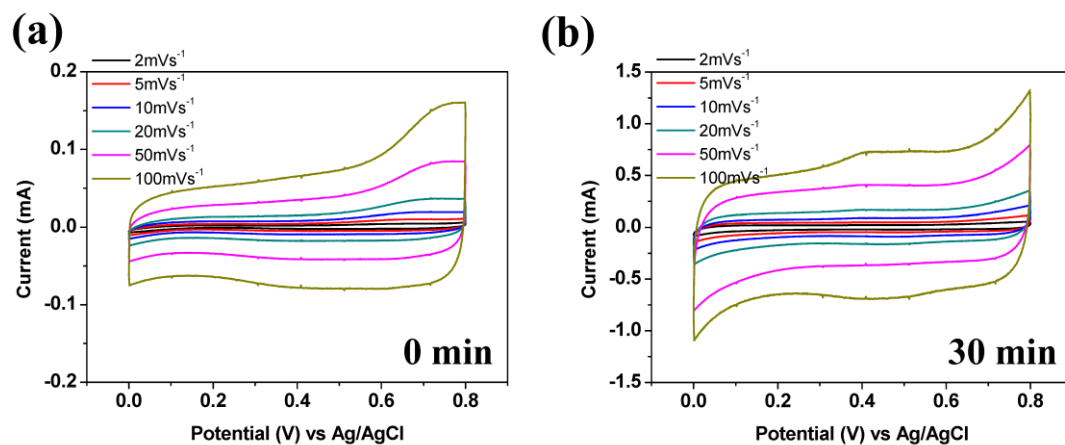

**Figure S3.** Cyclic voltammetry curves of (a) RuO<sub>2</sub> NRs and (b) RuO<sub>2</sub>/MnO<sub>2</sub> NRs with various scan rates ranging from 2 to 100 mV s<sup>-1</sup>. The MnO<sub>2</sub> coating time is 30 min.

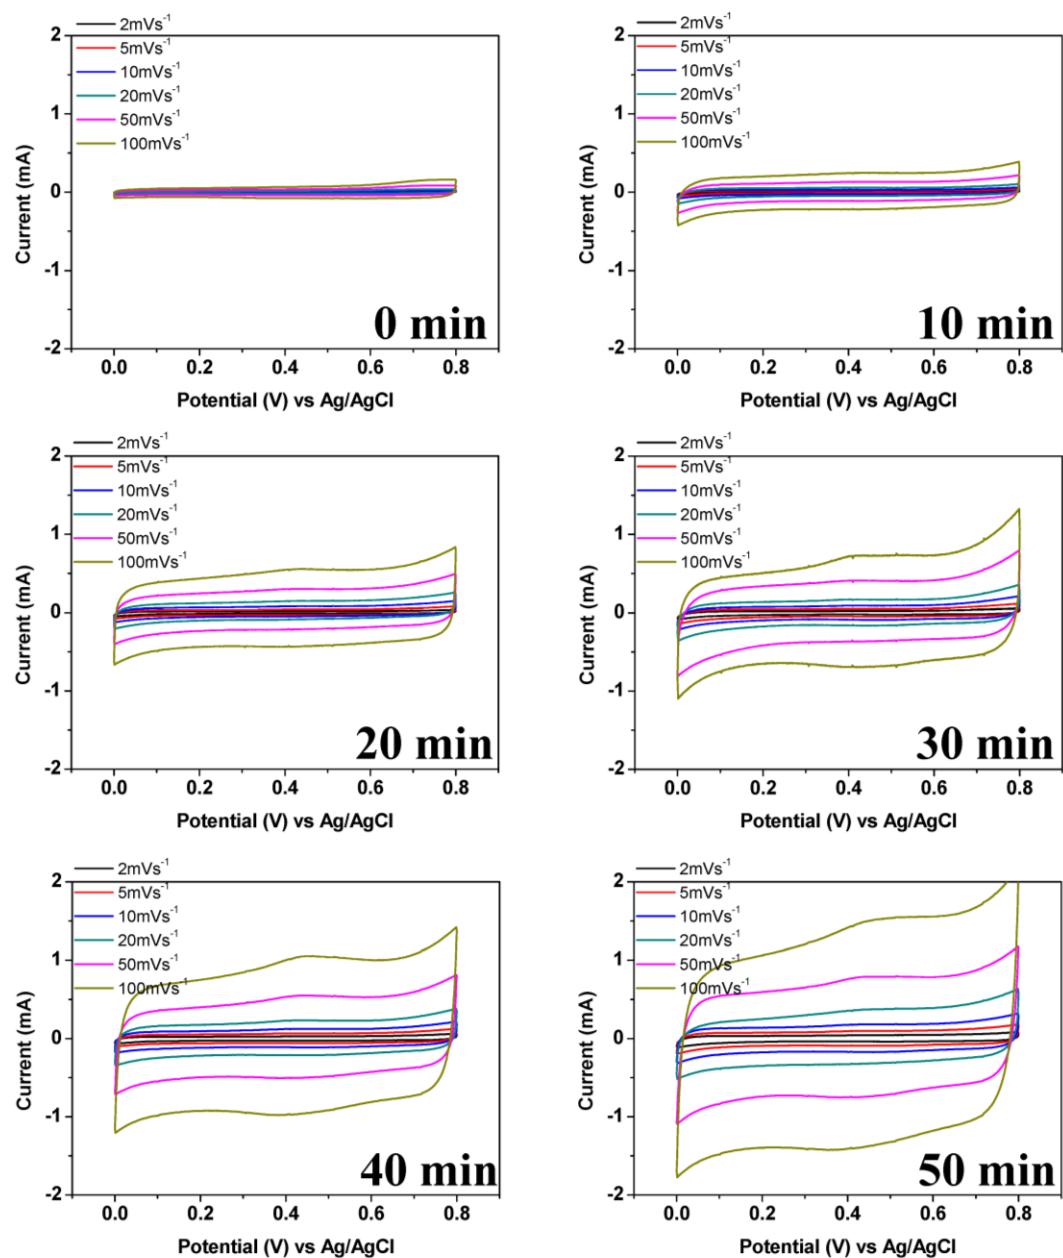

**Figure S4.** CV curves of RuO<sub>2</sub> NRs with various MnO<sub>2</sub> coating time.

#### Reference:

1. D. Portehault, S. Cassaignon, E. Baudrin and J.-P. Jolivet, *J. Mater. Chem.*, 2009, **19**, 2407-2416.
